1 **Epidemiological pattern of births from the largest surveillance database of live births in**  
2 **Brazil "SINASC" before and during the COVID-19 pandemic in the Brazilian Amazon**

3

4 Daniele Melo Sardinha<sup>1</sup>, Andréa Maria da Silva Luz<sup>2</sup>, Kátia Raquel Almeida Carneiro<sup>2</sup>,  
5 Mauro Daniel Rodrigues Paixão<sup>3</sup>, Sebastião Kauã de Sousa Bispo<sup>3</sup>, Natasha Cristina Oliveira  
6 Andrade<sup>3</sup>, Juliane Lima Alencar<sup>4</sup>, Tamires de Nazaré Soares<sup>5</sup>, Joyce dos Santos Freitas<sup>6</sup>,  
7 Rubenilson Caldas Valois<sup>5</sup>, Ana Lúcia da Silva Ferreira<sup>1</sup>, Karla Valéria Batista Lima<sup>1</sup>, Luana  
8 Nepomuceno Gondim Costa Lima<sup>1</sup>

9

10 <sup>1</sup>Programa de Pós-graduação em Biologia Parasitária na Amazônia, Universidade Estado do  
11 Pará e Instituto Evandro Chagas (PPGBPA/UEPA/IEC). Belém, Pará, Brazil.

12 <sup>2</sup>Fundação Santa Casa de Misericórdia do Pará, (FSCMP). Belém, Pará, Brazil.

13 <sup>3</sup>Universidade da Amazônia (UNAMA). Ananindeua, Pará, Brazil.

14 <sup>4</sup>Programa de Pós-graduação em Epidemiologia e Vigilância em Saúde, Instituto Evandro  
15 Chagas (PPGEVS/IEC). Ananindeua, Pará, Brazil.

16 <sup>5</sup>Programa de Pós-graduação em Enfermagem, Universidade do Estado do Pará  
17 (PPGENF/UEPA). Belém, Pará, Brazil.

18 Faculdade de Enfermagem, Instituto de Ciências de Saúde, Universidade Federal do Pará  
19 (FAENF/ICS/UFPA). Belém, Pará Brazil.

20

21 Corresponding author: Daniele Melo Sardinha

22 [Danielle-vianna20@hotmail.com](mailto:Danielle-vianna20@hotmail.com)

23

24 **Abstract**

25 The surveillance of live births in Brazil has been carried out since 1990 by the Information  
26 System on Live Births (SINASC), which was implemented by the Ministry of Health aiming  
27 at standardized registration on a national level. The state of Pará is part of the Brazilian  
28 Amazon, northern Brazil, which has several unique characteristics. Thus, the purpose of this  
29 study was to identify the epidemiological pattern of live births before and during the  
30 pandemic of COVID-19 in the state of Pará, 2016 to 2020. This is an ecological  
31 epidemiological time-series study, using epidemiological surveillance data from DATASUS,

32 referring to the Live Births Information System (SINASC). These are data that have been  
33 treated by surveillance and are in aggregate format. The study population is the live births  
34 residing in the state of Pará, in the period from 2016 to 2020. The data collection instrument  
35 was the Declaration of Live Births (DLB). There were 689,454 live births, and the highest  
36 rates of births were and continued to remain in the Marajó II, Baixo Amazonas, Xingu, and  
37 Tapajós regions. The Metropolitan I and Araguaia regions were and continue to be the lowest  
38 rates in the state. Age of the mother 15 to 19 years old 22.29%, 20 to 24 years old 30.05% and  
39 25 to 29 years old 22.58%, most of the single pregnancy type 98.32%, prenatal consultations,  
40 performed 7 or more 48.10%, followed by 4 to 6 consultations 33.98%, most presented 7 or  
41 more years of the study 48.10%, followed by 3 to 6 years 33.98%. Represented 51.21% male  
42 and 48.77% female. The occurrence of congenital anomalies represented 0.52% of live births.  
43 Another congenital malformation and deformity were the most prevalent at 25.53%, followed  
44 by Congenital deformities of the feet 14.90%, Other congenital malformations of the nervous  
45 system 14.84%, and Other congenital malformations 10.77%, Cleft lip, and cleft palate  
46 8.88%, Other congenital malformations digestive tract 8.10%. The demographic transition has  
47 already occurred for several decades, including the reduction of fertility and birth rate, so our  
48 study showed that the reduction in the number of live births was already a reality in the  
49 country, but we emphasize that this reduction was enhanced by the pandemic. We observed  
50 greater adherence to prenatal care and a lower prevalence of low birth weight compared to  
51 other studies, but the limitation was the absence of studies in the same place of the research.  
52 Regarding data incompleteness, we emphasize the ignored fields that reflect the fragility in  
53 the surveillance of live births, which was reinforced by the literature.

54 **Keywords:** Epidemiology; Health Surveillance; Health Indicators; SINASC; Live Births;  
55 COVID-19.

56 **INTRODUCTION**

57 Surveillance of live births in Brazil has been carried out since 1990 by the  
58 Information System on Live Births (SINASC), which was implemented by the Ministry of  
59 Health aiming at a standardized national registry of information on live births. SINASC uses  
60 the Declaration of Live Births (DLB) as an instrument for data collection, which has several  
61 variables on the mother, prenatal care, delivery, and the newborn. This surveillance system  
62 represents an essential source of information for health research and evaluation in the  
63 maternal and child area [1].

64 Thus, SINASC surveillance subsidizes public health measures concerning women's  
65 and children's health, such as public policies to reduce maternal mortality, and adherence to  
66 quality prenatal, delivery, and puerperium care. The DLB is mandatory to be issued in three  
67 copies, which will be a requirement for the birth certificate, which is a fundamental document  
68 for the child's social, educational, and economic policies regarding society. [2].

69 Thus, the epidemiological pattern of live births has been studied for several years,  
70 because profile changes must be identified for the development of strategies and  
71 understanding of associated factors. Authors have discussed the demographic transition,  
72 which highlights the reduction in fertility and birth rate, which has been occurring for decades  
73 in the world and Brazil [3].

74 The state of Pará is part of the Brazilian Amazon, northern Brazil, which has several  
75 unique characteristics, such as extensive geographical territory, compared to several European  
76 countries together, as well as being composed of rural areas larger than urban areas, which  
77 hinders access to education, health services, and health surveillance, indigenous peoples,  
78 illegal mining, mercury contamination, factors that directly impact the health of the  
79 population, making them vulnerable [4–6].

80 The arrival of the pandemic by COVID-19 weakened health and surveillance  
81 services worldwide, and it was no different in Brazil and Pará. However, the state of Pará

82 already has local vulnerabilities, thus the objective of this study was to identify the  
83 epidemiological pattern of live births before and during the pandemic of COVID-19 in the  
84 state of Pará, 2016 to 2020.

## 85 **METHOD**

86 Epidemiological, ecological, and time-series study with data from DATASUS'  
87 epidemiological surveillance of the Live Births Information System (SINASC). These are  
88 data that have been treated by surveillance and are in an aggregated format.

89 The study population is the live births residing in the state of Pará (figure 1), in the  
90 period from 2016 to 2020. The data were made available on the website of the Department of  
91 Informatics of the Unified Health System (DATASUS) [7].

92 **Figure 1.** The spatial location of the mesoregions and municipalities of the State of Pará,  
93 Amazon, Brazil.

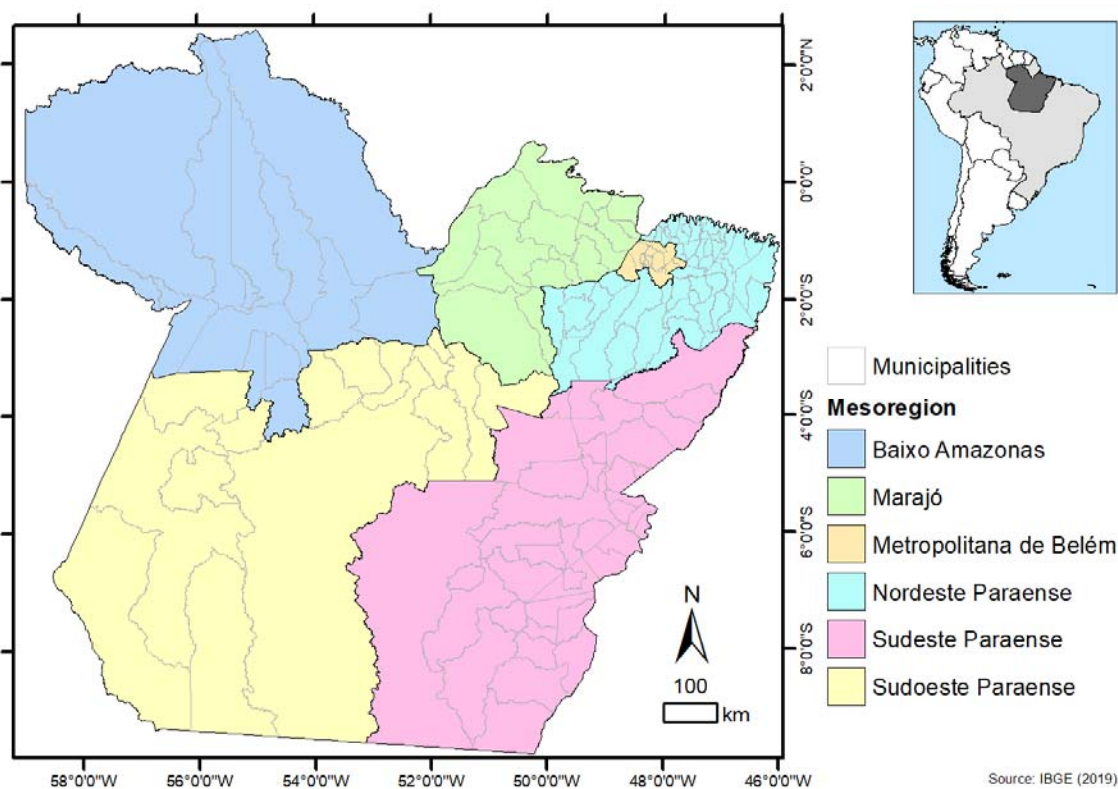

Source: (Sardinha, et al. 2021)[8].

97 The instrument for data collection was the Live Birth Declaration (DNL), the  
98 variables, year, age group, type of pregnancy, type of delivery, prenatal consultations,  
99 education, congenital anomaly, gender, and type of congenital anomaly were extracted. The  
100 data were analyzed by Excel 2019, from absolute and relative numbers, as well as analysis of  
101 the curve of the number of live births per year by the R2 equation, which shows if there is a  
102 change in pattern and informs the percentage of the difference between the years. We  
103 performed the calculation of the birth rate by health region from the resident population also  
104 extracted from DATASUS, the calculation was:

$$\frac{\text{Number of live birth}}{\text{Health Region Year Population}} \times 1.000$$

105  
106  
107  
108  
109 The spatial distribution of live births was performed by the health region of the state  
110 of Pará in the ArcGIS software (<https://www.arcgis.com/>) and classified according to the  
111 results of the birth rates, in five classes in red.

112 According to Resolution No. 510 of April 7, 2016, Article II, which deals with  
113 research that uses publicly accessible data, under Law No. 12,527 of November 18, 2011,  
114 Articles III (research that uses information in the public domain) and V (research in databases  
115 whose information is aggregated, without the possibility of individual identification), will not  
116 be registered or evaluated by the Ethics and Research Committee (CEP/CONEP) system.  
117 Thus, these types of studies are not recommended to be submitted for ethical review and can  
118 be freely conducted, since the publicly available data does not include data such as the names,  
119 phone numbers, and addresses of the participants [9,10].

## 120 **RESULTS**

121 In the state of Pará, there were 689,454 live births in the study period, highlighting  
122 the drop in the year 2020 which was 132,937, compared to 2019 that where 138,338. The

123 health regions with the highest numbers were Metropolitan I with 21.32%, Carajás with  
124 11.26%, and Baixo Amazonas with 11.22%, proportional to being the most populous regions  
125 (table 1).

126 In the analysis by the number of live births per year, the trend line showed the reduction of  
127 live births each year, enhanced by 2020. The R2 value showed that each year the reduction  
128 tends to be 23% (graph 1).

129 **Table 1** - Number of live births in the state of Pará by health region, from 2016 to 2020.

| Health Region     | 2016          | 2017          | 2018          | 2019          | 2020          | Total         | %             |
|-------------------|---------------|---------------|---------------|---------------|---------------|---------------|---------------|
| Araguaia          | 7477          | 7812          | 8311          | 8020          | 7731          | 39351         | 5,71          |
| Baixo Amazonas    | 14998         | 15422         | 15697         | 15810         | 15456         | 77383         | 11,22         |
| Carajás           | 15629         | 15330         | 16130         | 15335         | 15224         | 77648         | 11,26         |
| Lago de Tucuruí   | 6915          | 6844          | 6718          | 6474          | 6282          | 33233         | 4,82          |
| Metropolitana I   | 30359         | 30529         | 30197         | 29137         | 26753         | 146975        | 21,32         |
| Metropolitana II  | 6136          | 5981          | 6216          | 6106          | 5725          | 30164         | 4,38          |
| Metropolitana III | 13650         | 13605         | 14186         | 14109         | 13264         | 68814         | 9,98          |
| Rio Caetés        | 8716          | 8557          | 8587          | 8314          | 8093          | 42267         | 6,13          |
| Tapajós           | 3944          | 4409          | 4381          | 4360          | 4491          | 21585         | 3,13          |
| Tocantins         | 11523         | 11768         | 12227         | 11957         | 11605         | 59080         | 8,57          |
| Xingu             | 7009          | 6795          | 6970          | 6836          | 6575          | 34185         | 4,96          |
| Marajó I          | 3969          | 3959          | 4075          | 4038          | 4025          | 20066         | 2,91          |
| Marajó II         | 7354          | 7671          | 8123          | 7842          | 7713          | 38703         | 5,61          |
| <b>Total</b>      | <b>137679</b> | <b>138682</b> | <b>141818</b> | <b>138338</b> | <b>132937</b> | <b>689454</b> | <b>100,00</b> |

130 Source: MS/SVS/DASIS - Live Births Information System - SINASC.

131

132 **Graph 1** - Number of live births per year, in the state of Pará from 2016 to 2020.

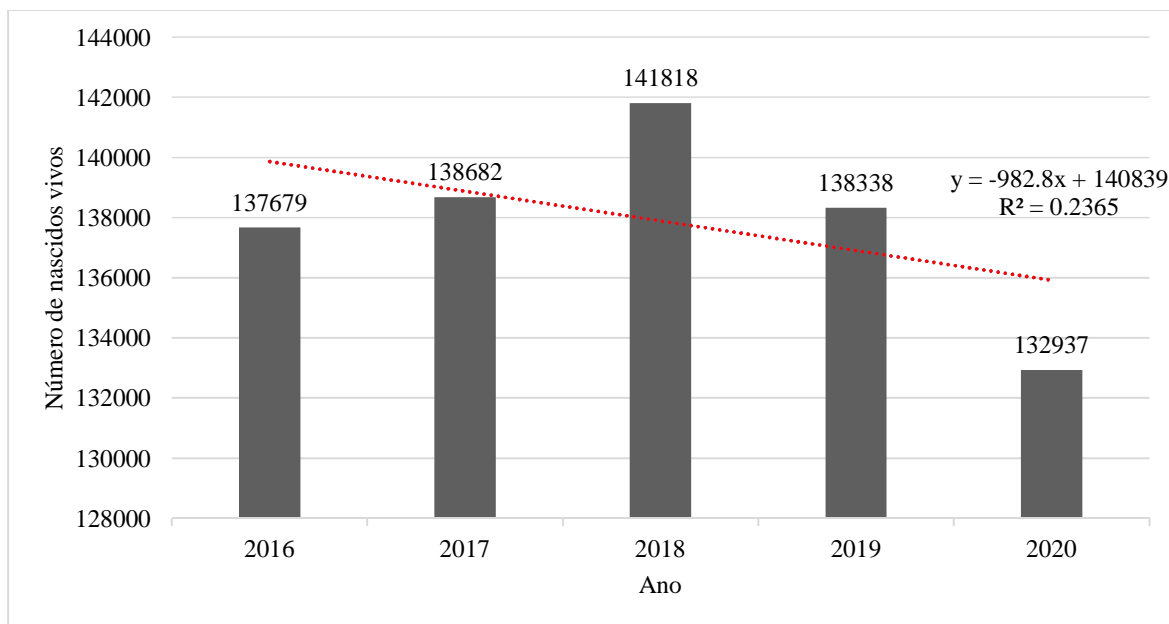

133

134 Source: MS/SVS/DASIS - Live Births Information System - SINASC.

135

136 We calculated the birth rate by health region, and also presented the spatial  
 137 distribution. The highest birth rates were and remain in the regions Marajó II (per year  
 138 23.86/24.58/25.69/24.49/23.80), Baixo Amazonas (per year 19.87/20.28/20.49/20.49/19.89),  
 139 Xingu (per year 20.67/19.82/20.11/19.52/18.58 and Tapajós (per year  
 140 18.01/20.07/19.87/19.72/20.25). The Metropolitan I (per year 13.85/13.83/13.58/13.02/11.87)  
 141 and Araguaia (per year 13.84/14.23/14.90/14.15/13.44) regions were and still are the lowest  
 142 rates in the state of Pará (table 2) (graph 2) (figures 1,2 and 3).

143

144 **Table 2** - Birth Rate per 1,000 population, health region in the state of Para 2016 to 2020.

| Health Region     | 2016  | 2017  | 2018  | 2019  | 2020  |
|-------------------|-------|-------|-------|-------|-------|
| Araguaia          | 13.84 | 14.23 | 14.90 | 14.15 | 13.44 |
| Baixo Amazonas    | 19.87 | 20.28 | 20.49 | 20.49 | 19.89 |
| Carajás           | 18.66 | 18.03 | 18.70 | 17.52 | 17.15 |
| Lago de Tucuruí   | 15.82 | 15.37 | 14.81 | 14.03 | 13.38 |
| Metropolitana I   | 13.85 | 13.83 | 13.58 | 13.02 | 11.87 |
| Metropolitana II  | 17.19 | 16.59 | 17.08 | 16.61 | 15.43 |
| Metropolitana III | 15.02 | 14.81 | 15.27 | 15.02 | 13.97 |
| Rio Caetés        | 16.53 | 16.09 | 16.00 | 15.36 | 14.83 |
| Tapajós           | 18.01 | 20.07 | 19.87 | 19.72 | 20.25 |
| Tocantins         | 16.98 | 17.12 | 17.56 | 16.96 | 16.26 |

|                  |       |       |       |       |       |
|------------------|-------|-------|-------|-------|-------|
| <b>Xingu</b>     | 20.67 | 19.82 | 20.11 | 19.52 | 18.58 |
| <b>Marajó I</b>  | 16.88 | 16.63 | 16.91 | 16.55 | 16.30 |
| <b>Marajó II</b> | 23.86 | 24.58 | 25.69 | 24.49 | 23.80 |
| <b>Total</b>     | 16.52 | 16.47 | 16.66 | 16.08 | 15.30 |

145 Source: MS/SVS/DASIS - Live Births Information System - SINASC.

146 **Graph 2** - Birth Rate per 1,000 inhabitants, health region in the state of Para 2016 to 2020.

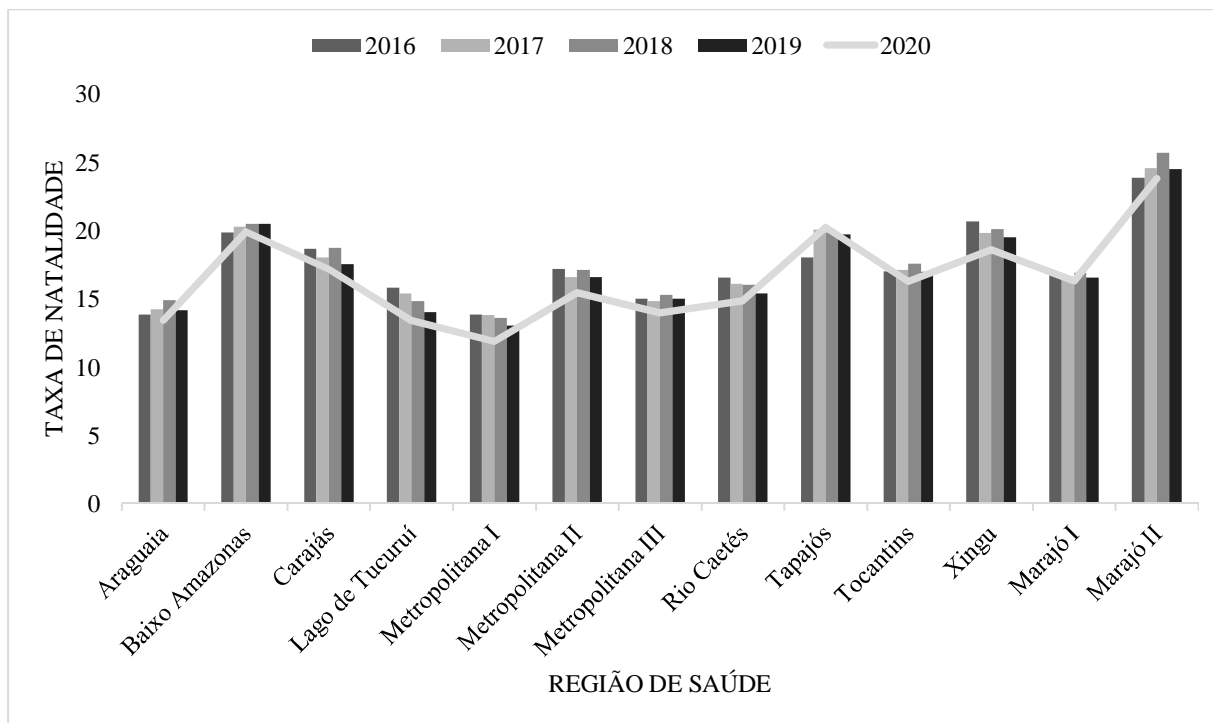

147

148 Source: MS/SVS/DASIS - Live Births Information System - SINASC.

149 **Figure 1** - Spatial distribution of birth rate by health region in the state of Pará, 2016 and  
 150 2017.



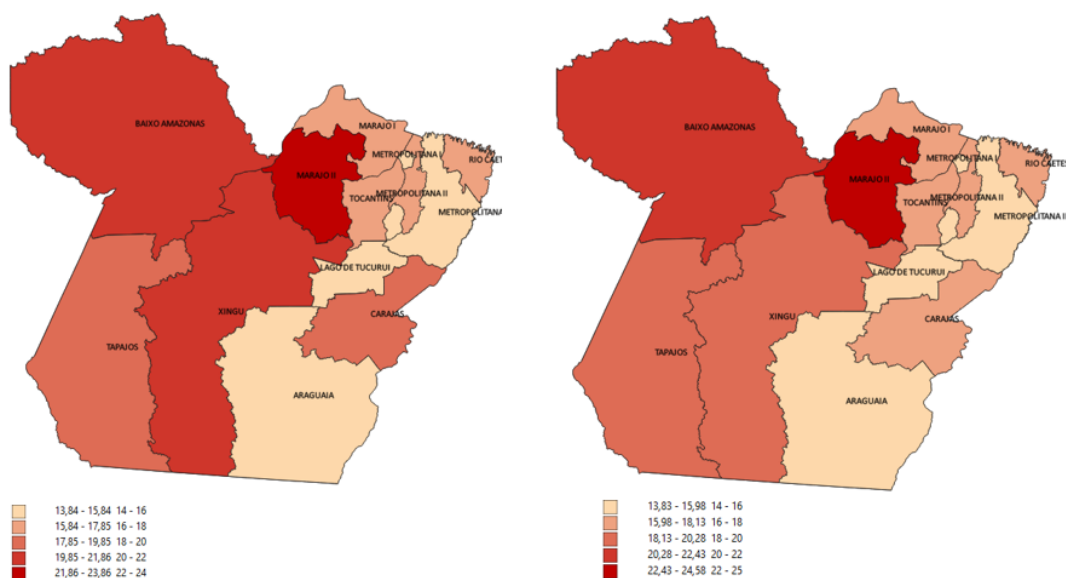

151

152 Source: MS/SVS/DASIS - Live Births Information System - SINASC. Software ArcGIS  
153 (<https://www.arcgis.com/>).

154

155 **Figure 2** - Spatial distribution of birth rate by health region in the state of Pará, 2018 and  
156 2019.

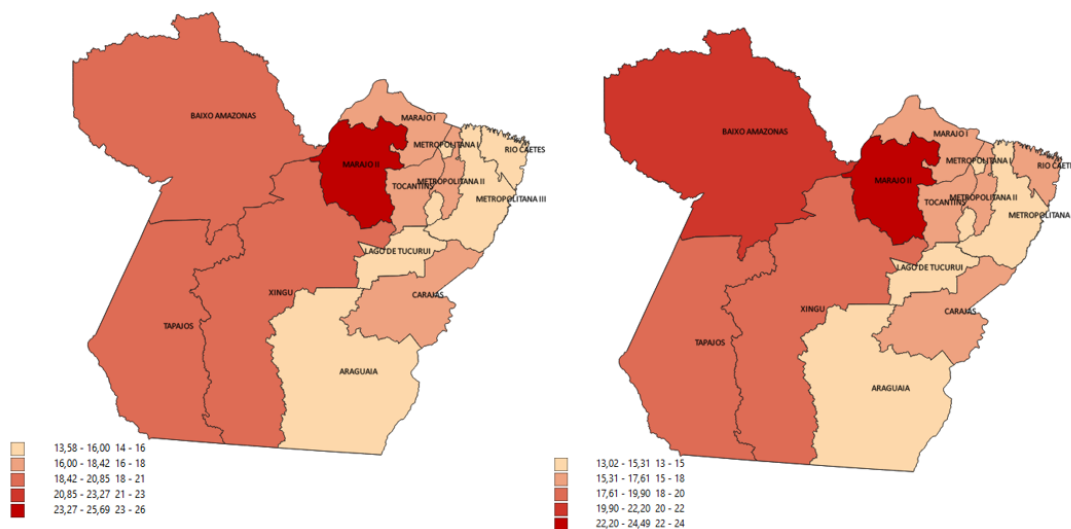

157

158 Source: MS/SVS/DASIS - Live Births Information System - SINASC. Software ArcGIS  
159 (<https://www.arcgis.com/>).

160

161 **Figure 3** - Spatial distribution of birth rate by health region in the state of Pará, 2020.

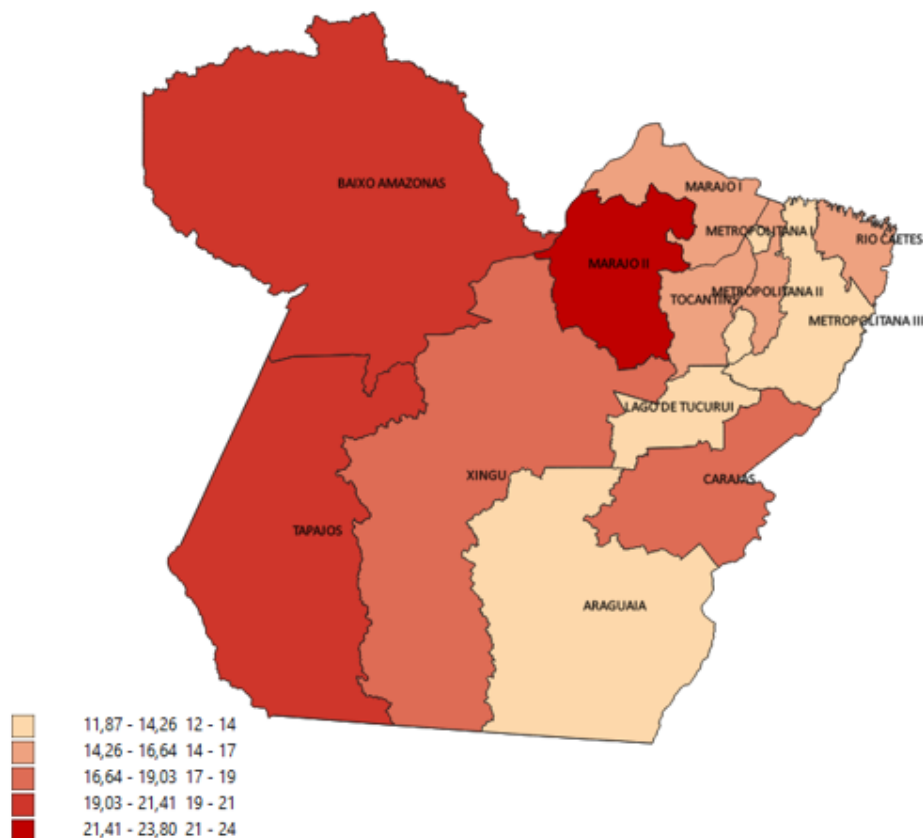

162

163 Source: MS/SVS/DASIS - Live Births Information System - SINASC. Software ArcGIS  
164 (<https://www.arcgis.com/>).

165

166 Regarding sex, the live births in the study period represented (51.21%) male and  
167 (48.77%) female, the remaining were ignored in the sex field. Regarding the age range, the  
168 majorities of women were between 15 to 19 years (22.29%), 20 and 24 years (30.05%), and  
169 25 to 29 years (22.58%). As well as the majority of single pregnancy type 98.32%. The  
170 mother's schooling by the number of years of study, the majority presented 7 or more years  
171 (48.10%), followed by 3 to 6 years (33.98%). In the comparison of schooling with the number  
172 of prenatal visits, 8 to 11 years of study who made 7 visits or more (59.19%), and those who  
173 did not make any visits with the same schooling was (35.78%) (table 3).

174           The single pregnancy type accounted for 98.33% of the live births. About the type of  
175 delivery, 50.20% were vaginal and 49.70 were cesarean. Concerning prenatal consultations,  
176 the majority had 7 or more 48.10%, followed by 4 to 6 consultations 33.98%. Regarding birth  
177 weight, the study showed 52,378 (7.59%) live births with a low birth weight of <2,499 g. The  
178 majority 64.61% weigh between 3000 to 3999 g (table 4).

179 **Table 3** - Sociodemographic variables of the mother and births by health region, state of Pará, 2016 to 2020.

| <b>Sex</b>                | <b>2016</b> | <b>%</b> | <b>2017</b> | <b>%</b> | <b>2018</b> | <b>%</b> | <b>2019</b> | <b>%</b> | <b>2020</b> | <b>%</b> | <b>Total</b> | <b>%</b> |
|---------------------------|-------------|----------|-------------|----------|-------------|----------|-------------|----------|-------------|----------|--------------|----------|
| Male                      | 70645       | 10.25    | 71244       | 10.33    | 72745       | 10.55    | 70644       | 10.25    | 67791       | 9.83     | 353069       | 51.21    |
| Female                    | 67020       | 9.72     | 67422       | 9.78     | 69042       | 10.01    | 67671       | 9.82     | 65121       | 9.45     | 336276       | 48.77    |
| Ignored                   | 16          | 0.00     | 18          | 0.00     | 32          | 0.00     | 26          | 0.00     | 26          | 0.00     | 118          | 0.02     |
| <b>Age of mother</b>      |             |          |             |          |             |          |             |          |             |          |              |          |
| Under 10 years old        | -           |          | -           |          | -           |          | 2           | 0.00     | -           |          | 2            | 0.00     |
| 10 to 14 years            | 2178        | 0.32     | 1867        | 0.27     | 1887        | 0.27     | 1816        | 0.26     | 1670        | 0.24     | 9418         | 1.37     |
| 15 to 19 years            | 33254       | 4.82     | 31949       | 4.63     | 31438       | 4.56     | 29504       | 4.28     | 27588       | 4.00     | 153733       | 22.30    |
| 20 to 24 years            | 42122       | 6.11     | 42050       | 6.10     | 42735       | 6.20     | 41002       | 5.95     | 39333       | 5.70     | 207242       | 30.06    |
| 25 to 29 years            | 30220       | 4.38     | 30841       | 4.47     | 32025       | 4.64     | 31797       | 4.61     | 30836       | 4.47     | 155719       | 22.59    |
| 30 to 34 years            | 19176       | 2.78     | 20158       | 2.92     | 21050       | 3.05     | 20956       | 3.04     | 20226       | 2.93     | 101566       | 14.73    |
| 35 to 39 years            | 8501        | 1.23     | 9367        | 1.36     | 10106       | 1.47     | 10575       | 1.53     | 10387       | 1.51     | 48936        | 7.10     |
| 40 to 44 years            | 2051        | 0.30     | 2268        | 0.33     | 2391        | 0.35     | 2486        | 0.36     | 2692        | 0.39     | 11888        | 1.72     |
| 45 to 49 years            | 160         | 0.02     | 166         | 0.02     | 162         | 0.02     | 174         | 0.03     | 172         | 0.02     | 834          | 0.12     |
| 50 to 54 years            | 12          | 0.00     | 12          | 0.00     | 15          | 0.00     | 24          | 0.00     | 24          | 0.00     | 87           | 0.01     |
| 55 to 59 years            | 2           | 0.00     | 4           | 0.00     | 3           | 0.00     | 1           | 0.00     | -           |          | 10           | 0.00     |
| 60 to 64 years            | 1           | 0.00     | -           |          | 6           | 0.00     | -           |          | 2           | 0.00     | 9            | 0.00     |
| 65 to 69 years            | -           |          | -           |          | -           |          | -           |          | 2           | 0.00     | 2            | 0.00     |
| Age ignored               | 4           | 0.00     | 2           | 0.00     | 1           | 0.00     | 4           | 0.00     | 6           | 0.00     | 17           | 0.00     |
| <b>Mother's schooling</b> |             |          |             |          |             |          |             |          |             |          |              |          |
| No                        | 1453        | 0.21     | 1261        | 0.18     | 1131        | 0.16     | 1028        | 0.15     | 967         | 0.14     | 5840         | 0.85     |
| 1 to 3 years              | 7435        | 1.08     | 6523        | 0.95     | 6006        | 0.87     | 5303        | 0.77     | 4420        | 0.64     | 29687        | 4.31     |
| 4 to 7 years              | 37245       | 5.40     | 35860       | 5.20     | 35524       | 5.15     | 33360       | 4.84     | 30892       | 4.48     | 172881       | 25.07    |
| 8 to 11 years             | 74619       | 10.82    | 75430       | 10.94    | 76046       | 11.03    | 77584       | 11.25    | 76869       | 11.15    | 380548       | 55.19    |
| 12 years and older        | 13378       | 1.94     | 14983       | 2.17     | 16081       | 2.33     | 16077       | 2.33     | 16017       | 2.32     | 76536        | 11.10    |
| Ignored                   | 3551        | 0.52     | 4627        | 0.67     | 7031        | 1.02     | 4989        | 0.72     | 3773        | 0.55     | 23971        | 3.48     |

180 Source: MS/SVS/DASIS - Live Births Information System - SINASC.

181 **Table 4** - Pregnancy and Birth Variables by health region, state of Pará, 2016 to 2020.

| <b>Pregnancy Type</b>        | <b>2016</b> | <b>%</b> | <b>2017</b> | <b>%</b> | <b>2018</b> | <b>%</b> | <b>2019</b> | <b>%</b> | <b>2020</b> | <b>%</b> | <b>Total</b> | <b>%</b> |
|------------------------------|-------------|----------|-------------|----------|-------------|----------|-------------|----------|-------------|----------|--------------|----------|
| Single                       | 135392      | 19.64    | 136509      | 19.80    | 139408      | 20.22    | 135921      | 19.71    | 130702      | 18.96    | 677932       | 98.33    |
| Double                       | 2058        | 0.30     | 1969        | 0.29     | 2202        | 0.32     | 2254        | 0.33     | 2071        | 0.30     | 10554        | 1.53     |
| Triple and more              | 16          | 0.00     | 26          | 0.00     | 39          | 0.01     | 35          | 0.01     | 33          | 0.00     | 149          | 0.02     |
| Ignored                      | 215         | 0.03     | 180         | 0.03     | 170         | 0.02     | 131         | 0.02     | 132         | 0.02     | 828          | 0.12     |
| <b>Type of birth</b>         |             |          |             |          |             |          |             |          |             |          |              |          |
| Vaginal                      | 71213       | 10.33    | 70954       | 10.29    | 71553       | 10.38    | 68702       | 9.96     | 63701       | 9.24     | 346123       | 50.20    |
| Cesarean                     | 66259       | 9.61     | 67573       | 9.80     | 70139       | 10.17    | 69535       | 10.09    | 69144       | 10.03    | 342650       | 49.70    |
| Ignored                      | 209         | 0.03     | 157         | 0.02     | 127         | 0.02     | 104         | 0.02     | 93          | 0.01     | 690          | 0.10     |
| <b>Prenatal consultation</b> |             |          |             |          |             |          |             |          |             |          |              |          |
| None                         | 8241        | 1.20     | 6586        | 0.96     | 6401        | 0.93     | 5457        | 0.79     | 7653        | 1.11     | 34338        | 4.98     |
| From 1 to 3                  | 16809       | 2.44     | 17580       | 2.55     | 17428       | 2.53     | 15836       | 2.30     | 18649       | 2.70     | 86302        | 12.52    |
| From 4 to 6                  | 48595       | 7.05     | 48056       | 6.97     | 48342       | 7.01     | 45203       | 6.56     | 44095       | 6.40     | 234291       | 33.98    |
| 7 or more                    | 63519       | 9.21     | 65987       | 9.57     | 69028       | 10.01    | 71451       | 10.36    | 61660       | 8.94     | 331645       | 48.10    |
| Ignored                      | 517         | 0.07     | 475         | 0.07     | 620         | 0.09     | 394         | 0.06     | 881         | 0.13     | 2887         | 0.42     |
| <b>Birth Weight</b>          |             |          |             |          |             |          |             |          |             |          |              |          |
| Less than 500g               | 208         | 0.03     | 198         | 0.03     | 225         | 0.03     | 221         | 0.03     | 200         | 0.03     | 1052         | 0.15     |
| 500 to 999g                  | 481         | 0.07     | 553         | 0.08     | 546         | 0.08     | 556         | 0.08     | 507         | 0.07     | 2643         | 0.38     |
| 1000 to 1499g                | 846         | 0.12     | 884         | 0.13     | 901         | 0.13     | 837         | 0.12     | 832         | 0.12     | 4300         | 0.62     |
| 1500 a 2499g                 | 8687        | 1.26     | 8868        | 1.29     | 9180        | 1.33     | 8982        | 1.30     | 8666        | 1.26     | 44383        | 6.44     |
| 2500 a 2999g                 | 30810       | 4.47     | 30259       | 4.39     | 31165       | 4.52     | 30285       | 4.39     | 29129       | 4.22     | 151648       | 22.00    |
| 3000 to 3999 g               | 88833       | 12.88    | 89820       | 13.03    | 91449       | 13.26    | 89489       | 12.98    | 85902       | 12.46    | 445493       | 64.61    |
| 4000g and above              | 7664        | 1.11     | 7942        | 1.15     | 8197        | 1.19     | 7871        | 1.14     | 7579        | 1.10     | 39253        | 5.69     |
| Ignored                      | 152         | 0.02     | 160         | 0.02     | 156         | 0.02     | 100         | 0.01     | 123         | 0.02     | 691          | 0.10     |

182 Source: MS/SVS/DASIS - Live Births Information System - SINASC.

183

**Table 5** - Occurrence of congenital anomalies by health region, state of Pará, 2016 to 2020.

| <b>Congenital anomaly</b>                                                    | <b>2016</b> | <b>%</b> | <b>2017</b> | <b>%</b> | <b>2018</b> | <b>%</b> | <b>2019</b> | <b>%</b> | <b>2020</b> | <b>%</b> | <b>Total</b> | <b>%</b> |
|------------------------------------------------------------------------------|-------------|----------|-------------|----------|-------------|----------|-------------|----------|-------------|----------|--------------|----------|
| Yes                                                                          | 626         | 0.09     | 699         | 0.10     | 778         | 0.11     | 753         | 0.11     | 757         | 0.11     | 3613         | 0.52     |
| No                                                                           | 135516      | 19.66    | 137475      | 19.94    | 140105      | 20.32    | 135385      | 19.64    | 129587      | 18.80    | 678068       | 98.35    |
| Ignored                                                                      | 1539        | 0.22     | 510         | 0.07     | 936         | 0.14     | 2203        | 0.32     | 2594        | 0.38     | 7782         | 1.13     |
| <b>Type of congenital anomaly</b>                                            |             |          |             |          |             |          |             |          |             |          |              |          |
| Spina bifida                                                                 | 16          | 0.00     | 20          | 0.00     | 27          | 0.00     | 26          | 0.00     | 20          | 0.00     | 109          | 0.02     |
| Other congenital malformations of the nervous system                         | 126         | 0.02     | 109         | 0.02     | 122         | 0.02     | 95          | 0.01     | 83          | 0.01     | 535          | 0.08     |
| Congenital malformations of the circulatory system                           | 9           | 0.00     | 17          | 0.00     | 29          | 0.00     | 40          | 0.01     | 43          | 0.01     | 138          | 0.02     |
| Cleft lip and cleft palate                                                   | 59          | 0.01     | 68          | 0.01     | 66          | 0.01     | 59          | 0.01     | 68          | 0.01     | 320          | 0.05     |
| Absent atresia and stenosis of the small intestine                           | -           |          | 6           | 0.00     | 3           | 0.00     | 2           | 0.00     | 2           | 0.00     | 13           | 0.00     |
| Other congenital malformations of the digestive system                       | 30          | 0.00     | 43          | 0.01     | 63          | 0.01     | 79          | 0.01     | 77          | 0.01     | 292          | 0.04     |
| Undescended testicle                                                         | 3           | 0.00     | 4           | 0.00     | 4           | 0.00     | 7           | 0.00     | 7           | 0.00     | 25           | 0.00     |
| Other genitourinary system malformations                                     | 29          | 0.00     | 29          | 0.00     | 48          | 0.01     | 42          | 0.01     | 39          | 0.01     | 187          | 0.03     |
| Congenital deformities of the hip                                            | -           |          | -           |          | 1           | 0.00     | 4           | 0.00     | -           |          | 5            | 0.00     |
| Congenital deformities of the feet                                           | 95          | 0.01     | 102         | 0.01     | 115         | 0.02     | 118         | 0.02     | 107         | 0.02     | 537          | 0.08     |
| Other congenital malformations and deformities of the musculoskeletal system | 164         | 0.02     | 201         | 0.03     | 189         | 0.03     | 171         | 0.02     | 195         | 0.03     | 920          | 0.13     |
| Other congenital malformations                                               | 77          | 0.01     | 67          | 0.01     | 76          | 0.01     | 80          | 0.01     | 88          | 0.01     | 388          | 0.06     |
| Chromosomal anomalies NCOP                                                   | 15          | 0.00     | 30          | 0.00     | 30          | 0.00     | 27          | 0.00     | 27          | 0.00     | 129          | 0.02     |
| Hemangioma and lymphangioma                                                  | -           |          | 1           | 0.00     | 3           | 0.00     | 2           | 0.00     | -           |          | 6            | 0.00     |
| No congenital anomaly/not informed                                           | 137058      | 19.88    | 137987      | 20.01    | 141043      | 20.46    | 137589      | 19.96    | 132182      | 19.17    | 685859       | 99.48    |

185 Fonte: MS/SVS/DASIS - Sistema de Informações sobre Nascidos Vivos – SINASC.

186 The occurrence of congenital anomalies represented 0.52% of live births, 0.55% male, and  
187 0.47% female (table 6). We analyzed the types of congenital anomalies, Other congenital  
188 malformation and deformity were the most prevalent 25.53%, followed by Congenital deformities  
189 of the feet 14.90%, Other congenital malformations of the nervous system 14.84%, Other  
190 congenital malformations 10.77%, Cleft lip and cleft palate 8.88%, Other congenital malformations  
191 digestive tract 8.10%. The others represent less than 6% each (table 5 and 6).

192 **Table 6** - Live births by type of congenital anomaly, Pará state 2016 to 2020.

| <b>Congenital anomaly type</b>                                                      | <b>Total<br/>(3604)</b> | <b>%</b> |
|-------------------------------------------------------------------------------------|-------------------------|----------|
| <b>Other congenital malformations and deformities of the musculoskeletal system</b> | 920                     | 25.53    |
| <b>Congenital deformities of the feet</b>                                           | 537                     | 14.9     |
| <b>Other congenital malformations of the nervous system</b>                         | 535                     | 14.84    |
| <b>Other congenital malformations</b>                                               | 388                     | 10.77    |
| <b>Cleft lip and cleft palate</b>                                                   | 320                     | 8.88     |
| <b>Other congenital malformations of the digestive tract</b>                        | 292                     | 8.1      |
| <b>Other congenital malformations of the genitourinary system</b>                   | 187                     | 5.19     |
| <b>Congenital malformations of the circulatory system</b>                           | 138                     | 3.83     |
| <b>Chromosomal abnormalities NCOP</b>                                               | 129                     | 3.58     |
| <b>Spina bifida</b>                                                                 | 109                     | 3.02     |
| <b>Undescended testicle</b>                                                         | 25                      | 0.69     |
| <b>Absent atresia and stenosis of the small bowel</b>                               | 13                      | 0.36     |
| <b>Hemangioma and lymphangioma</b>                                                  | 6                       | 0.17     |
| <b>Congenital hip deformities</b>                                                   | 5                       | 0.14     |

193 Source: MS/SVS/DASIS - Live Births Information System - SINASC.

194

## 195 **DISCUSSION**

196 In this study, we characterized the live births of the state of Pará in the years 2016 to 2020,  
197 based on data from the epidemiological surveillance of live births in Brazil SINASC. On the  
198 number of live births, we evidenced a reduction in the trend line, which was potentiated in 2020.  
199 According to the civil registry, an official page that shares data on births shows that in 2021 in the

200 state of Pará there were 121,739 births, and highlights that with the arrival of the pandemic in Brazil  
201 births reduced by 15%, but emphasizes that the birth rate decline had already been occurring [11].

202 A report in the CNN Brazil newspaper emphasized the reduction of the fertility rate in  
203 Brazil, which was enhanced by the pandemic of COVID-19. They highlighted that the fear and  
204 anguish of staying in a maternity ward in times of pandemic, emotional issues, and worries about  
205 SARS-CoV-2 are associated with this reduction [12].

206 Studies also showed that maternal mortality increased during the pandemic and that it was  
207 directly associated with COVID-19. In 2021, Brazil had the highest maternal mortality rate for  
208 COVID-19 in the world, which alerted researchers, because due to underreporting these data can be  
209 even higher, as COVID-19 is potentiated during pregnancy due to various physiological changes  
210 [13,14]. Research on maternal mortality in the state of Pará showed that 44 maternal deaths had  
211 occurred by June 8, 2020, of which 20 were due to COVID-19. [15].

212 Regarding the birth rate reduction, a 2012 study already discussed the demographic  
213 transition since 1950, highlighting the declines in mortality, birth rate, and fertility in this process,  
214 but emphasized that in the North and Northeast of Brazil this process was less evident [16]. Another  
215 study analyzed the fertility transition based on epidemiological data, and stated that the drop in  
216 fertility began in the mid-1930s in Brazil, especially in the South and Southeast regions, and also  
217 cited in the study factors regarding the reduction, such as women's choice to have fewer children,  
218 low social cost, contraceptive methods, and education [17].

219 Research in the municipality of Rio de Janeiro on the epidemiological profile of live births  
220 showed that most were full-term, adequate weight, and Apgar score on the first and fifth minutes  
221 between 7 and 10 points. The mothers were mostly brown, single, with 8 to 11 years of schooling,  
222 and aged between 20 and 34. Regarding the type of delivery, Cesarean was more frequent [18].  
223 Being similar concerning age, and education, however different in the type of delivery, because in



224 our study the predominance was a vaginal delivery, even with little difference between the cesarean  
225 delivery. Another study described the profile of live births in the city of Viçosa from 2001 to 2007,  
226 showing the main age range of mothers was between 20 and 29 years, representing 55% of this age  
227 group in 2007. The percentage of teenage mothers decreased from 18.2 to 14.6% from 2001 to  
228 2007. Concerning the type of delivery, an increase in cesarean sections and a decrease in vaginal  
229 deliveries are emphasized. However, vaginal deliveries are higher than cesarean deliveries among  
230 adolescents. As for weight, low birth weight reached 8% in 2007. The Apgar score in the first and  
231 fifth minutes  $>7$  represented 73 and 89% in 2007. [19].

232 A study aimed to know the epidemiological profile of births in Chapecó/SC, in the period  
233 from July 2011 to June 2013, based on SINASC. They identified a total of 5,918 live births, of these  
234 9.2% were born weighing less than 2,500 g; 9.4% were premature; 15.7% were children of  
235 adolescent mothers, and 20% of women had seven prenatal visits or less [20]. In our study, the  
236 majority had 7 or more prenatal visits, and the prevalence of low weight was lower.

237 Regarding the prevalence of congenital anomalies, a study described congenital anomalies  
238 (CA) among live births of mothers residing in Tangará da Serra, MT, Brazil, the period 2006-2016.  
239 Of 15,689 live births, 77 were registered (prevalence of 4.9/1,000); there was an 80.7% increase in  
240 CA registered in 2016, representing 10.3/1.000 live births, including five cases of microcephaly;  
241 The prevalence of CA was higher among children born to women aged over 35 years (prevalence  
242 ratio [PR] =1.91; confidence interval [95% CI] 1.01;3.60), premature infants (PR=2.22; 95% CI  
243 1.26;3.92) and low birth weight infants (PR=3.21; 95% CI 1.86;5.54) [21].

244 Concerning the higher birth rates in the health regions of Marajó II, Baixo Amazonas, and  
245 the Tapajós, they are associated with lower schooling and less access to health services that these  
246 regions have characteristics of local vulnerability because they have a large geographical extension

247 and have many people in rural and indigenous areas. It is worth mentioning that these are regions of  
248 illegal mining and environmental contamination from mercury [22,23].

249         Regarding the quality of the SINASC information, a study highlighted the weaknesses in  
250 the completeness of the essential fields in the surveillance of live births, and that these indicators  
251 are worse in the northern region of the country [24]. In another study in Brazil from 2006 to 2010  
252 on the completeness of the variables of the DNV, 21 of the 23 variables analyzed showed  
253 completeness above 90.0%. 97.9% of the hospital delivery variables had complete data; they found  
254 no differences in the proportion of births concerning macroregion and sex concerning the 2010  
255 census; 82.6% of the data were received on time in 2010; the ratio between live births notified and  
256 estimated was 89.4% in 2006 and 97.4% in 2010 [25]. Another study conducted a review of data  
257 completeness, from previously published studies, 13 articles were reviewed. The evaluation of  
258 coverage was the subject of analysis in eight studies, completeness in four, and reliability in seven.  
259 Most of them presented results of coverage higher than 90%, indicating their feasibility for the  
260 calculation of indicators. However, under-registration of births in SINASC prevailed, ranging from  
261 75.8% to 99.5%. The variables maternal education, parity, and the number of prenatal visits were  
262 those that presented the greatest inconsistency. Thus, the variable parity was the one that presented  
263 the greatest incompleteness [26].

264         The impossibility of including the data of live births from 2021 stands out as a limitation  
265 because the DATASUS surveillance system only makes the data available after the treatment of the  
266 data and the qualification of the information, and in Brazil generally the availability of data from  
267 the previous year is only made in October to December of the current year.

## 268 **CONCLUSION**

269         We presented the epidemiological pattern of live births in the state of Pará, before and  
270 during the pandemic of COVID-19, and showed that the demographic transition had already been

271 occurring for several decades, including the reduction of fecundity and birth rate, thus our study  
272 showed that the reduction in the number of live births was already a reality in the country, but we  
273 emphasized that this reduction was enhanced by the pandemic.

274 The other variables were similar, except for the higher prenatal care adherence which was  
275 better than the previous studies, and the lower prevalence of low weight, but the limitation was that  
276 studies in the same place of the research were not found.

277 Regarding the incompleteness of the data, we highlight the ignored fields that reflect the  
278 fragility in the surveillance of live births, which was reinforced by the literature. Health promotion  
279 should be strengthened concerning the qualification of surveillance professionals, and the theme  
280 should be discussed with greater accuracy in the academies for training health professionals.

## 281 REFERENCES

- 282 [1] Brasil M da S. Apresentação - SINASC - CGIAE - DASNT - SVS/MS. Secr Vigilância Em  
283 Saúde 2022. <http://svs.aids.gov.br/dantps/cgiae/sinasc/apresentacao/> (accessed June 5, 2022).
- 284 [2] Cavalcante JN de B, Coutinho DJG. A importância e aplicabilidade dos sistemas de  
285 informações sobre nascidos vivos e mortalidade: uma revisão integrativa / The importance  
286 and applicability of information systems on live births and mortality: an integrative review.  
287 *Brazilian J Dev* 2021;7:73272–9. <https://doi.org/10.34117/bjdv7n7-482>.
- 288 [3] Mello AV de, Silva ZP da. INDICADORES DE SAÚDE E QUALIDADE DOS DADOS:  
289 UMA ANÁLISE DO SISTEMA DE INFORMAÇÃO SOBRE NASCIDOS VIVOS NO  
290 PARANÁ, BRASIL (1996 – 2018). *Saúde (Santa Maria)* 2021;47.  
291 <https://doi.org/10.5902/2236583463542>.
- 292 [4] da Silva Santos MR, Vitorino MI, Pereira LCC, da Silva Pimentel MA, Quintão AF.  
293 Socioenvironmental Vulnerability to Climate Change: Conditions of Coastal Municipalities

- 294 in Pará State. *Ambient Soc* 2021;24:1–22. <https://doi.org/10.1590/1809->  
295 4422ASOC20200167R1VU2021L3AO.
- 296 [5] Meneses H do N de M, Oliveira-Da-costa M, Basta PC, Morais CG, Pereira RJB, de Souza  
297 SMS, et al. Mercury Contamination: A Growing Threat to Riverine and Urban Communities  
298 in the Brazilian Amazon. *Int J Environ Res Public Heal* 2022, Vol 19, Page 2816  
299 2022;19:2816. <https://doi.org/10.3390/IJERPH19052816>.
- 300 [6] Barcellos De Bakker L, Gasparinetti P, Mello De Queiroz J, Santiago De Vasconcellos AC,  
301 Sakakibara M, Kyaw WT, et al. Economic Impacts on Human Health Resulting from the Use  
302 of Mercury in the Illegal Gold Mining in the Brazilian Amazon: A Methodological  
303 Assessment. *Int J Environ Res Public Heal* 2021, Vol 18, Page 11869 2021;18:11869.  
304 <https://doi.org/10.3390/IJERPH182211869>.
- 305 [7] Brasil Mi da S. DATASUS – Ministério da Saúde. DATASUS 2022.  
306 <https://datasus.saude.gov.br/> (accessed June 5, 2022).
- 307 [8] Sardinha DM, do Socorro Pompeu de Loiola R, Ferreira AL da S, de Sá CAF, Rodrigues YC,  
308 Lima KVB, et al. Risk factors associated with the severity of COVID-19 in a region of the  
309 Brazilian Amazon. *Sci Rep* 2021;11:20569. <https://doi.org/10.1038/s41598-021-00009-y>.
- 310 [9] Brasil M da S. RESOLUÇÃO N° 510, DE 07 DE ABRIL DE 2016. Resoluções 2016:1–10.  
311 <http://conselho.saude.gov.br/resolucoes/2016/Reso510.pdf> (accessed August 27, 2021).
- 312 [10] Brasil M da J. LEI N° 12.527, DE 18 DE NOVEMBRO DE 2011. Diário Of Da União -  
313 DOU 2011. [http://www.planalto.gov.br/ccivil\\_03/\\_ato2011-2014/2011/lei/112527.htm](http://www.planalto.gov.br/ccivil_03/_ato2011-2014/2011/lei/112527.htm)  
314 (accessed July 25, 2020).
- 315 [11] AERPEN B. Portal da Transparência - Registro Civil. ARPEN Bras 2022.  
316 <https://transparencia.registrocivil.org.br/registros> (accessed June 1, 2022).

- 317 [12] Janone L. Pandemia intensifica tendência e taxa de natalidade segue em queda no Brasil |  
318 CNN Brasil. CNN Bras 2022. [https://www.cnnbrasil.com.br/nacional/pandemia-intensifica-](https://www.cnnbrasil.com.br/nacional/pandemia-intensifica-tendencia-e-taxa-de-natalidade-segue-em-queda-no-brasil/)  
319 [tendencia-e-taxa-de-natalidade-segue-em-queda-no-brasil/](https://www.cnnbrasil.com.br/nacional/pandemia-intensifica-tendencia-e-taxa-de-natalidade-segue-em-queda-no-brasil/) (accessed June 5, 2022).
- 320 [13] Souza ASR, Amorim MMR. Mortalidade materna pela COVID-19 no Brasil. *Rev Bras*  
321 *Saúde Matern Infant* 2021;21:253–6. <https://doi.org/10.1590/1806-9304202100S100014>.
- 322 [14] Nakamura-Pereira M, Ramos Amorim MM, De Carvalho Pacagnella R, Libertad M,  
323 Takemoto S, Cristina F, et al. COVID-19 e morte materna no Brasil: uma tragédia invisível.  
324 *FEMINA* 2020;496:496–504. [https://doi.org/10.1016/S0140-6736\(20\)30360-3](https://doi.org/10.1016/S0140-6736(20)30360-3).
- 325 [15] Monteiro JRAR, Macias BSG, Cabral ATM, Silva R do SR e, Sardinha DM. COVID-19 e os  
326 Impactos na Mortalidade Materna no Estado do Pará-Brasil: Amazônia Brasileira. *Asian J*  
327 *Pregnancy Childbirth* 2021:34–8.
- 328 [16] Vasconcelos AMN, Gomes MMF. Transição demográfica: a experiência brasileira.  
329 *Epidemiol e Serviços Saúde* 2012;21:539–48. [https://doi.org/10.5123/S1679-](https://doi.org/10.5123/S1679-49742012000400003)  
330 [49742012000400003](https://doi.org/10.5123/S1679-49742012000400003).
- 331 [17] Gonçalves GQ, de Carvalho JAM, Wong LLR, Turra CM. A transição da fecundidade no  
332 Brasil ao longo do século XX – uma perspectiva regional. *Rev Bras Estud Popul* 2019;36:1–  
333 34. <https://doi.org/10.20947/S0102-3098A0098>.
- 334 [18] Lopes EB, Silva ACSS da, Nicol AF, Padilha GK de M, Batista WCA, Knupp VMAO. Perfil  
335 epidemiológico de nascidos vivos: Uma análise comparativa em um território marcada por  
336 mosaicos geográficos. *Res Soc Dev* 2021;10:e23210716134. [https://doi.org/10.33448/rsd-](https://doi.org/10.33448/rsd-v10i7.16134)  
337 [v10i7.16134](https://doi.org/10.33448/rsd-v10i7.16134).
- 338 [19] Júnior A do CP, Henriques BD. Perfil dos nascidos vivos em Viçosa , Minas Gerais , no  
339 período de 2001 a 2007. *Rev Med Minas Gerais* 2010;20:508–13.

- 340 [20] Correio RA da S, Correio LF, Correio MAB. Perfil epidemiológico dos nascidos vivos no  
341 município de Chapecó-SC. Rev Eletrônica Comun Informação e Inovação Em Saúde  
342 2016;10:1–16. <https://doi.org/10.29397/reciis.v10i2.1037>.
- 343 [21] Silva JH da, Terças ACP, Pinheiro LCB, França GVA de, Atanaka M, Schüler-Faccini L.  
344 Profile of congenital anomalies among live births in the municipality of Tangará da Serra,  
345 Mato Grosso, Brazil, 2006-2016. Epidemiol e Serviços Saúde 2018;27:e2018008.  
346 <https://doi.org/10.5123/S1679-49742018000300017>.
- 347 [22] IBGE IB de G e E. Pará | Cidades e Estados | IBGE 2020. <https://www.ibge.gov.br/cidades-e-estados/pa/> (accessed July 7, 2020).
- 349 [23] Castro NSS de, Lima M de O. Hair as a Biomarker of Long Term Mercury Exposure in  
350 Brazilian Amazon: A Systematic Review. Int J Environ Res Public Health 2018;15:500.  
351 <https://doi.org/10.3390/ijerph15030500>.
- 352 [24] Szwarcwald CL, Do Carmo Leal M, Esteves-Pereira AP, Da Silva de Almeida W, De Frias  
353 PG, Damacena GN, et al. Avaliação das informações do *Sistema de Informações sobre*  
354 *Nascidos Vivos* (SINASC), Brasil. Cad Saude Publica 2019;35. <https://doi.org/10.1590/0102-311X00214918>.
- 356 [25] Oliveira MM de, Andrade SSC de A, Dimech GS, Oliveira JCG de, Malta DC, Rabello Neto  
357 D de L, et al. Evaluation of the National Information System on Live Births in Brazil, 2006-  
358 2010. Epidemiol e Serviços Saúde 2015;24:629–40. <https://doi.org/10.5123/S1679-49742015000400005>.
- 360 [26] Pedraza DF. Qualidade do Sistema de Informações sobre Nascidos Vivos (Sinasc): análise  
361 crítica da literatura. Cien Saude Colet 2012;17:2729–37. <https://doi.org/10.1590/S1413-81232012001000021>.
